# Supplementary material for: A Customised Target Capture Sequencing Tool for Molecular Identification of Aloe Vera and Relatives
Source: Research Square preprint supplement (doi:10.21203/rs.3.rs-537180/v1), 2021-06-02
Supplement: Supplementary file 1 [file de93c2339bed3685d475c89f.xlsx]

## Sheet: Pilot study
Locus	Max length (reference)	Annotation (O. sativa)	# Introns (reference)	Min length recovered	% Min recovered	Max length recovered	% Max recovered	# Sequences recovered	% Pairwise identity	Potential paralog
1	1351	OS01G01130	6	831	0	1338	99.0377	23	89.3
2	1785	OS01G01190	0	891	49.916	1944	108.908	24	93.1
3	1894	OS01G01410	3	672	35.4805	1929	101.848	24	89.8
4	2019	OS01G03144	10	1035	51.263	2019	100	24	80.6
5	1778	OS01G09800	3	609	34.252	2253	126.715	24	97.5
6	2706	OS01G10800	0	1926	71.1752	2751	101.663	24	96.5
7	1728	OS01G11070	9	1449	0	1731	100.174	23	98.6
8	1474	OS01G11220	3	555	37.6526	1473	99.9322	24	86.9
9	1547	OS01G14100	6	1011	0	1545	99.8707	23	96.3
10	1457	OS01G14820	3	1119	0	1452	99.6568	23	96.5
11	1272	OS01G15850	7	381	29.9528	1176	92.4528	24	95.5
12	1437	OS01G31610	2	795	55.3236	1437	100	24	93.6	Y
13	1407	OS01G35040	2	1317	93.6034	1707	121.322	24	94.8
14	1749	OS01G39960	10	666	38.0789	1755	100.343	24	90.6
15	1018	OS01G43250	8	162	15.9136	1017	99.9018	24	87.6
16	2777	OS01G43630	10	399	14.368	2778	100.036	24	98.9
17	1269	OS01G45370	9	282	22.2222	1269	100	24	94
18	1620	OS01G51360	0	801	49.4444	1620	100	24	95.9
19	1027	OS01G53910	1	495	0	1011	98.4421	17	97.6
20	1884	OS01G55300	13	459	0	1587	84.2357	23	74
21	3002	OS01G55530	0	2142	71.3524	3012	100.333	24	97.7
22	1994	OS01G57900	0	756	37.9137	1992	99.8997	24	94.2
23	864	OS01G64930	2	279	32.2917	582	67.3611	24	98.6
24	1542	OS01G67170	2	1107	0	1473	95.5253	23	98.1
25	2443	OS01G67750	8	543	22.2268	2658	108.801	24	92.6
26	1465	OS01G68770	6	438	29.8976	1461	99.727	24	86.3
27	3903	OS01G72310	7	1617	41.4297	3897	99.8463	24	98.2
28	1502	OS01G72520	3	813	54.1278	1632	108.655	24	92.2
29	3892	OS01G73514	0	2772	71.223	3888	99.8972	24	97.3	Y
30	1602	OS01G73680	8	114	7.1161	1521	94.9438	24	94.6
31	1809	OS01G73950	0	1653	91.3765	1812	100.166	24	96.7	Y
32	1695	OS02G02000	1	732	43.1858	1674	98.7611	24	96.7	Y
33	768	OS02G03740	7	234	0	735	95.7031	21	98.3
34	2537	OS02G07050	0	1617	63.7367	2727	107.489	24	97.4
35	1838	OS02G07360	6	750	0	1656	90.0979	23	92.2
36	1379	OS02G07740	8	132	9.57215	1377	99.855	24	85.5
37	1439	OS02G13100	1	753	52.328	1446	100.486	24	97.5
38	951	OS02G14790	1	363	0	936	98.4227	21	93.5
39	1558	OS02G34990	6	633	40.629	1545	99.1656	24	97.3
40	1697	OS02G37910	8	219	12.9051	1449	85.386	24	81.6
41	1767	OS02G38290	6	1068	60.4414	1698	96.0951	24	93.1
42	1767	OS02G43920	4	1002	56.7063	1767	100	24	92.7
43	1230	OS02G47920	5	798	0	1203	97.8049	23	97.2
44	1544	OS02G50100	4	933	60.4275	1509	97.7332	24	88.7
45	1413	OS02G51080	2	540	38.2166	1413	100	24	93.2
46	2337	OS02G51330	4	1302	55.7125	2337	100	24	98.7
47	1613	OS02G51480	1	417	25.8524	1611	99.876	24	94.3
48	1392	OS02G52370	7	357	25.6466	1833	131.681	24	87.3
49	1523	OS02G54200	0	864	56.7301	1521	99.8687	24	98.1
50	1757	OS02G54980	1	1221	69.4935	1779	101.252	24	95.1
51	1585	OS02G56040	10	1164	0	1542	97.2871	23	94.5
52	1087	OS02G56210	7	672	61.8215	1086	99.908	24	89.9
53	2217	OS02G56565	12	351	15.8322	2217	100	24	97.1
54	1615	OS02G57050	7	843	52.1981	1614	99.9381	24	96.4
55	2361	OS02G57160	12	1050	44.4727	2139	90.5972	24	93.2
56	1950	OS02G57470	3	1122	57.5385	1950	100	24	93.5
57	6353	OS02G58410	15	3891	61.2467	6276	98.788	24	96
58	1238	OS02G58510	0	1113	0	1236	99.8384	23	96.8
59	2912	OS03G01100	8	642	22.0467	2910	99.9313	24	95.8
60	2035	OS03G01830	8	1122	55.1351	2028	99.656	24	91.8
61	6024	OS03G02970	17	2673	44.3725	6030	100.1	24	95
62	2089	OS03G04270	3	1605	76.831	2085	99.8085	24	96.4
63	2436	OS03G04450	0	1677	68.8424	2436	100	24	98.5
64	1099	OS03G06230	2	423	38.4895	987	89.8089	24	92.9
65	3244	OS03G07580	4	1053	32.4599	3243	99.9692	24	98.3
66	2173	OS03G11670	0	1371	63.0925	2172	99.954	24	98.1
67	1324	OS03G17700	5	390	29.4562	1764	133.233	24	94.5
68	2339	OS03G18210	6	654	27.9607	2343	100.171	24	98.4
69	1731	OS03G19280	6	993	0	1977	114.211	23	79.8
70	2280	OS03G19530	5	489	21.4474	2280	100	24	98.4
71	2646	OS03G19690	13	585	22.1088	2652	100.227	24	91.8
72	3143	OS03G27250	16	2364	75.2148	3144	100.032	24	96.6
73	3825	OS03G31550	10	246	6.43137	3825	100	24	95.8
74	2360	OS03G40020	0	1014	42.9661	2358	99.9153	24	98.2
75	1104	OS03G46460	0	957	86.6848	1104	100	24	96.8
76	1950	OS03G49210	12	654	33.5385	1950	100	24	91.5
77	1609	OS03G53510	3	981	60.9695	1605	99.7514	24	93.3
78	1058	OS03G55330	1	636	60.1134	1056	99.811	24	95.9
79	1701	OS03G55970	10	597	35.097	1701	100	24	94.6
80	2500	OS03G56850	0	1113	44.52	2499	99.96	24	97.7
81	1862	OS03G60460	3	654	35.1235	1860	99.8926	24	96.5
82	3141	OS03G60910	4	2295	73.0659	3141	100	24	95
83	1912	OS03G61130	2	1149	60.0941	1911	99.9477	24	94.6
84	2070	OS03G63920	10	1734	0	2070	100	23	97.3
85	2094	OS04G02730	9	405	19.341	2091	99.8567	24	96.2
86	1499	OS04G25410	2	216	14.4096	1497	99.8666	24	97.7
87	2859	OS04G31390	4	735	25.7083	2859	100	24	93.9
88	806	OS04G35560	1	588	72.9529	804	99.7519	24	98.3
89	2031	OS04G37670	8	921	45.3471	2277	112.112	24	84.1
90	838	OS04G39170	3	348	41.5274	837	99.8807	24	95.3
91	957	OS04G44620	5	840	87.7743	957	100	24	97.7
92	1587	OS04G47280	2	1254	79.017	1590	100.189	24	94.8
93	1771	OS04G49060	3	1413	79.7854	2175	122.812	24	98.5
94	1548	OS04G49530	5	372	24.031	1545	99.8062	24	88.1
95	1200	OS04G50860	2	459	38.25	1200	100	24	93.9
96	1003	OS04G53612	1	255	25.4237	1002	99.9003	24	94.9
97	2925	OS04G58410	3	1704	58.2564	2925	100	24	93.2
98	3118	OS05G05840	5	1164	37.3316	3084	98.9096	24	90.8
99	2397	OS05G06260	16	255	10.6383	2232	93.1164	24	88.9
100	1804	OS05G06890	3	402	22.2838	1806	100.111	24	95.2
101	2174	OS05G11850	5	1563	71.8951	2172	99.908	24	97.2
102	1906	OS05G12140	5	453	23.7671	1983	104.04	24	95.9
103	2500	OS05G19380	0	399	15.96	2499	99.96	24	97.5	Y
104	2466	OS05G50950	0	660	26.764	2469	100.122	24	96.2
105	1448	OS05G50980	11	753	52.0028	1449	100.069	24	90.3
106	1839	OS06G01304	4	942	51.2235	1839	100	24	98.2
107	1299	OS06G02430	7	813	0	1221	93.9954	23	88.8
108	966	OS06G04460	4	459	47.5155	948	98.1366	24	96
109	1180	OS06G06720	2	690	58.4746	1176	99.661	24	96.4
110	1562	OS06G07550	4	408	26.1204	1563	100.064	24	98.4
111	4657	OS06G09880	3	1551	33.3047	4830	103.715	24	85.6
112	1630	OS06G10770	3	972	59.6319	1602	98.2822	24	96.1
113	1348	OS06G14490	6	141	10.4599	1206	89.4659	24	92.1	Y
114	2753	OS06G16390	14	975	35.4159	2745	99.7094	24	95.3
115	1709	OS06G21560	8	1320	0	1707	99.883	23	97.5
116	1882	OS06G21600	7	1161	61.6897	1881	99.9469	24	95.3
117	1596	OS06G27890	9	1296	0	1755	109.962	23	91.9	Y
118	1274	OS06G33810	4	246	19.3093	1272	99.843	24	89.6	Y
119	1632	OS06G44060	6	717	0	1641	100.551	23	92.6
120	1507	OS06G51350	0	948	62.9064	1509	100.133	24	97.2
121	2047	OS07G02090	1	492	0	2553	124.719	23	97.3
122	1902	OS07G02280	0	1311	68.9274	1905	100.158	24	94.4
123	2181	OS07G05570	5	1803	82.6685	2181	100	24	95.3
124	1224	OS07G05880	1	1209	98.7745	1224	100	24	96.7
125	3234	OS07G07080	9	702	21.7069	3237	100.093	24	85.5
126	2138	OS07G10540	12	186	8.69972	2091	97.8017	24	86.5
127	1587	OS07G12320	0	342	21.5501	1587	100	24	90.3
128	757	OS07G15490	1	291	38.4412	762	100.661	24	98.4
129	1280	OS07G30170	5	369	28.8281	1278	99.8438	24	90.9
130	2523	OS07G33340	8	363	14.3876	2490	98.692	24	95.4
131	1122	OS07G36250	4	609	0	1122	100	23	91.2
132	1025	OS07G37840	0	279	0	1005	98.0488	23	90.6	Y
133	973	OS07G38240	1	846	86.9476	1428	146.763	24	80
134	1731	OS07G38790	3	786	45.4073	1731	100	24	91.4	Y
135	1811	OS07G40800	5	483	26.6703	1809	99.8896	24	98.8
136	1826	OS07G43990	1	1074	58.8171	1824	99.8905	24	95
137	1938	OS07G44410	1	1851	95.5108	1938	100	24	97.2
138	1812	OS07G44640	10	375	20.6954	1812	100	24	97.8
139	2572	OS07G44800	2	1140	44.3235	2553	99.2613	24	96.2
140	1552	OS07G45090	0	1020	65.7216	1440	92.7835	24	98.3
141	989	OS08G01320	3	381	38.5238	987	99.7978	24	98.7
142	1083	OS08G01620	2	621	0	1083	100	23	84
143	1290	OS08G10450	1	576	44.6512	1524	118.14	24	89.3
144	1920	OS08G14620	0	1278	66.5625	1920	100	24	98
145	1569	OS08G17390	6	375	23.9006	1563	99.6176	24	93
146	1651	OS08G23360	11	153	0	1536	93.0345	23	59.6
147	1880	OS08G24390	11	576	0	783	41.6489	23	86.9
148	1626	OS08G28180	1	1053	64.7601	1626	100	24	97.6
149	1200	OS08G35740	4	246	20.5	1200	100	24	91.6
150	2701	OS08G38570	9	612	22.6583	2694	99.7408	24	86.3
151	1047	OS08G40430	0	465	44.4126	1047	100	24	97.8
152	1467	OS08G41380	0	318	21.6769	1968	134.151	24	77.3	Y
153	1447	OS08G44840	1	465	32.1355	1593	110.09	24	76.3
154	1097	OS09G02130	5	162	0	810	73.8377	23	88.1
155	1026	OS09G02284	2	399	0	1008	98.2456	22	92.5
156	1121	OS09G15810	5	180	16.0571	1119	99.8216	24	91.1
157	1417	OS09G16910	0	885	62.4559	1413	99.7177	24	97.6
158	957	OS09G17680	4	114	11.9122	957	100	24	98.1
159	1607	OS09G20820	6	384	23.8955	1539	95.7685	24	96.5
160	1265	OS09G24660	2	651	51.4625	1263	99.8419	24	96.2
161	3200	OS09G25550	0	1095	34.2188	3198	99.9375	24	96.1
162	2581	OS09G27370	2	1830	70.9028	2580	99.9613	24	97.6
163	1148	OS09G34970	6	177	15.4181	1113	96.9512	24	62.7
164	1680	OS09G38420	8	369	21.9643	1680	100	24	79.1
165	1113	OS10G04620	5	468	0	1113	100	23	71.3	Y
166	1059	OS10G06720	4	408	38.5269	1059	100	24	97.2
167	1215	OS10G08840	7	339	27.9012	1110	91.358	24	83
168	2074	OS10G10990	8	1200	0	1956	94.3105	23	91.8
169	3449	OS10G28600	0	1428	41.4033	3447	99.942	24	95.3
170	1901	OS10G31810	0	1245	0	1893	99.5792	23	98.2
171	1231	OS10G35920	0	306	24.8578	1230	99.9188	24	85
172	2279	OS10G40130	3	924	40.5441	2172	95.305	24	97.6
173	1347	OS10G40920	0	1170	86.8597	1740	129.176	24	95.5
174	1500	OS10G41180	1	444	29.6	1500	100	24	97.4
175	2000	OS11G28980	4	450	22.5	2001	100.05	24	89.2
176	3303	OS11G32470	3	2877	87.1026	3303	100	24	97.5
177	2037	OS11G33090	11	1587	0	1995	97.9381	23	91.9
178	1653	OS11G34210	7	651	39.3829	1653	100	24	94
179	1683	OS11G34360	4	1248	74.1533	1683	100	24	96.1
180	1248	OS11G36060	5	129	10.3365	1248	100	24	81.6
181	2502	OS11G41990	7	1770	70.7434	2571	102.758	24	86.7
182	969	OS11G43890	1	180	0	969	100	22	97.6
183	1980	OS12G17310	1	1788	90.303	1980	100	24	98.6
184	4022	OS12G36170	7	1446	35.9523	4023	100.025	24	93.7
185	2340	OS12G36670	6	450	19.2308	1893	80.8974	24	94.5
186	1669	OS12G41670	11	528	31.6357	1506	90.2337	24	94.8
187	2622	OS12G44170	1	1293	49.3135	2622	100	24	94
188	3157	OS01G15300	13	447	14.159	3156	99.9683	24	91.6
189	1077	OS04G15920	3	342	31.7549	1077	100	24	95.5
Total	353794		871
			31 loci without introns
